# Supplementary material for: Combination between lacunary polyoxometalates and high-nuclear transition metal clusters under hydrothermal conditions: I. from isolated cluster to 1-D chain
Source: Royal Society of Chemistry journal article supplement (doi:10.1039/b617191e), 2007-01-01
Supplement: b617191e.pdf [file b617191e.pdf]

## **Combination between Lacunary Polyoxometalates and High-Nuclear Transition Metal Clusters Under Hydrothermal Conditions:**

### **I. From Isolated Cluster to 1-D Chain**

Shou-Tian Zheng,<sup>a</sup> Da-Qiang Yuan,<sup>a</sup> Jie Zhang<sup>a</sup>, Hong-Peng Jia<sup>a</sup> and Guo-Yu Yang<sup>\*,a,b</sup>

<sup>a</sup> *State Key Laboratory of Structural Chemistry, Fujian Institute of Research on the Structure of Matter,  
Chinese Academy of Sciences, Fuzhou, Fujian 350002 (China)*

<sup>b</sup> *State Key Laboratory of Coordination Chemistry, Nanjing University, Nanjing, Jiangsu 210093 (China)*

#### **Experimental Section:**

All chemicals employed in this study were analytical reagent. Elemental analyses of C, H and N were carried out with a Vario EL III elemental analyzer. IR spectra (KBr pellets) were recorded on an ABB Bomem MB 102 spectrometer. Thermal analyses were performed in a dynamic oxygen atmosphere with a heating rate of 10 °C/min, using a METTLER TGA/SDTA851<sup>e</sup> thermal analyzer. Variable temperature susceptibility measurements were carried out in the temperature range 2-300 K at a magnetic field of 0.5T for **3** and **4** on polycrystalline samples with a Quantum Design PPMS-9T magnetometer. The experimental susceptibilities were corrected for the Pascal's constants. The optical diffuse reflectance spectra of powdered **3** and **4** were measured at room temperature using a Perkin-Elmer Lambda 900 Uv-vis spectrophotometer equipped with an integrating sphere attachment and BaSO<sub>4</sub> as reference.

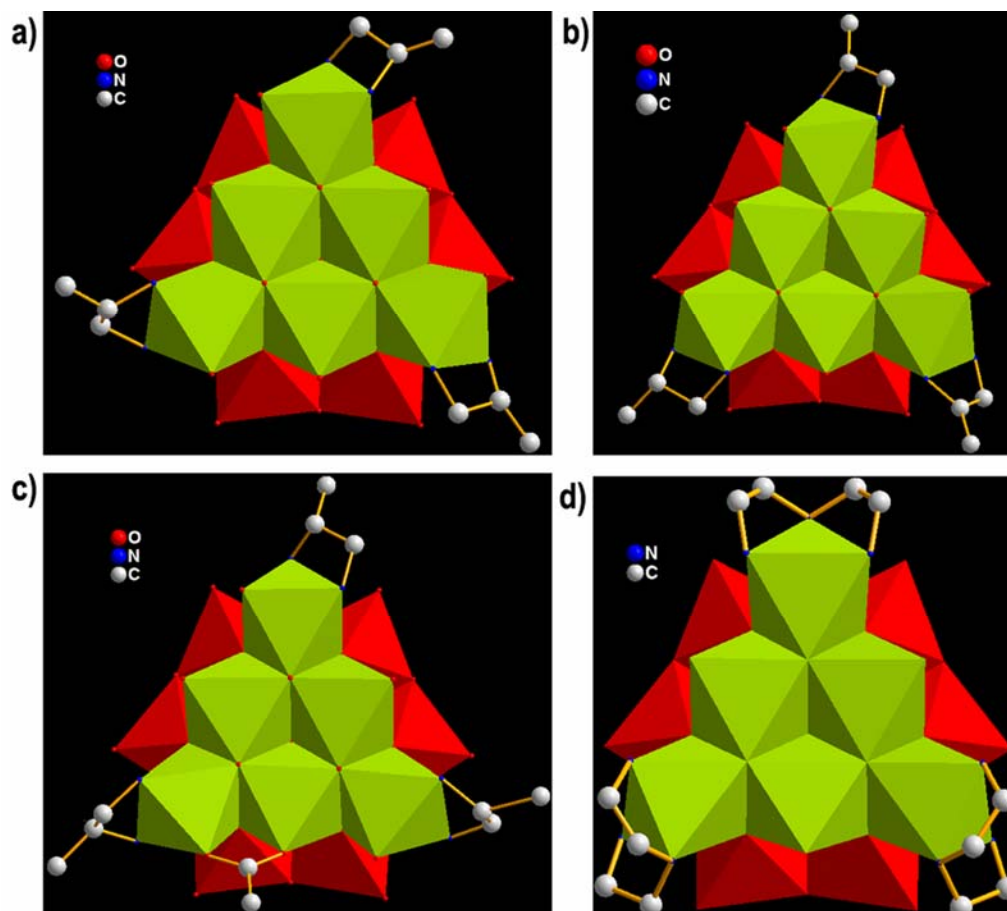

**Figure S1.** Polyhedral representations of the large hybrid cluster anions of [Ni<sub>6</sub>(μ<sub>3</sub>-OH)<sub>3</sub>(H<sub>2</sub>O)<sub>6</sub>(enMe)<sub>3</sub>(B-α-SiW<sub>9</sub>O<sub>34</sub>)] in **1** (a), [Ni<sub>6</sub>(μ<sub>3</sub>-OH)<sub>3</sub>(H<sub>2</sub>O)<sub>6</sub>(enMe)<sub>3</sub>(B-α-SiW<sub>9</sub>O<sub>34</sub>)] in **2** (b), and [Ni<sub>6</sub>(μ<sub>3</sub>-OH)<sub>3</sub>(H<sub>2</sub>O)<sub>4</sub>(CH<sub>3</sub>COO)(enMe)<sub>3</sub>(B-α-PW<sub>9</sub>O<sub>34</sub>)] in **3** (c), as well as large cluster unit of [Ni<sub>6</sub>(μ<sub>3</sub>-OH)<sub>3</sub>(H<sub>2</sub>O)<sub>2</sub>(dien)<sub>3</sub>(B-α-PW<sub>9</sub>O<sub>34</sub>)] in **4** (d), respectively.

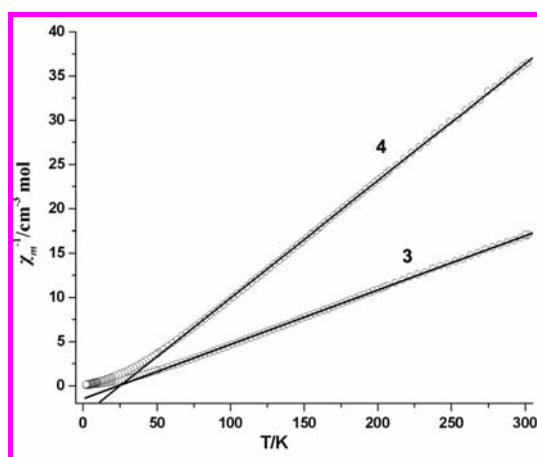

**Figure S2.** Temperature dependence of  $\chi_m^{-1}(\text{O})$  for **3** and **4**. The solid lines are the best-fit according to the Curie-Weiss law.

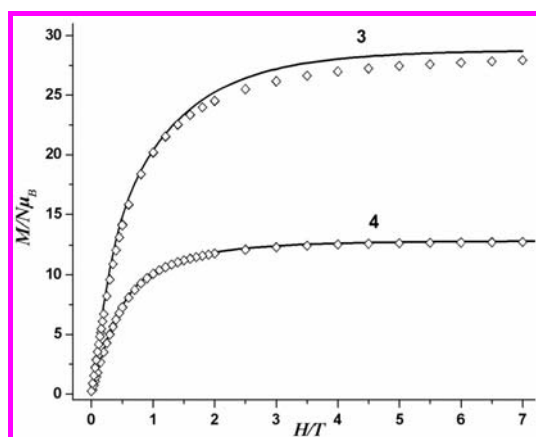

**Figure S3.** Magnetization measurement, in the reduced form of  $M/N\mu_B$ , in the field range 0 - 7 T at 2 K of **3** and **4**. The solid lines represent the simulation according to the values obtained from the fit of the susceptibility data.

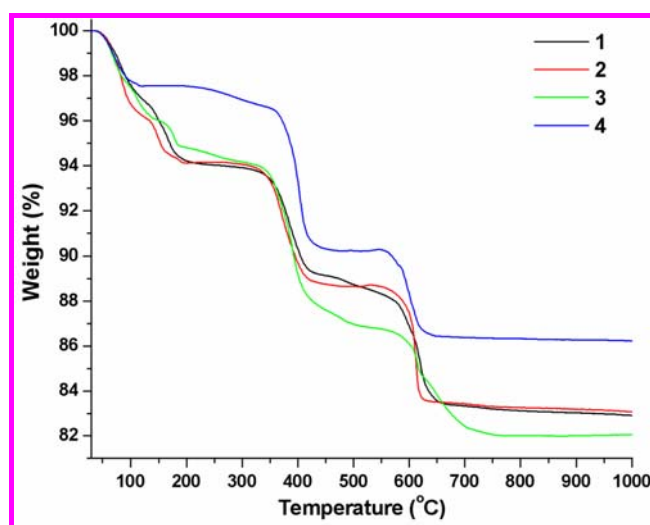

**Figure S4.** TGA curves of **1-4**

All the TG curves of **1-4** show three major weight loss stages, which are fallen in the regions about 43-210, 245-490 and 549-745 °C, respectively. The whole weight loss processes of **1-4** are attributed to the loss of water molecules and organic ligands. The observed total weight loss (**1**, 15.14%; **2**, 16.43%; **3**, 17.97%; **4**, 13.57%) is in agreement with the calculated value (**1**, 16.94%, corresponding to the loss of 35 water molecules and 6 enMe molecules; **2**, 16.52%, corresponding to the loss of 25 water molecules and 8 enMe molecules; **3**, 17.32%, corresponding to the loss of 23 water molecules, 2 CH<sub>3</sub>COOH molecules and 8 enMe molecules; **4**, 14.55%, corresponding to the loss of 7.5 water molecules and 3 dien molecules, respectively).

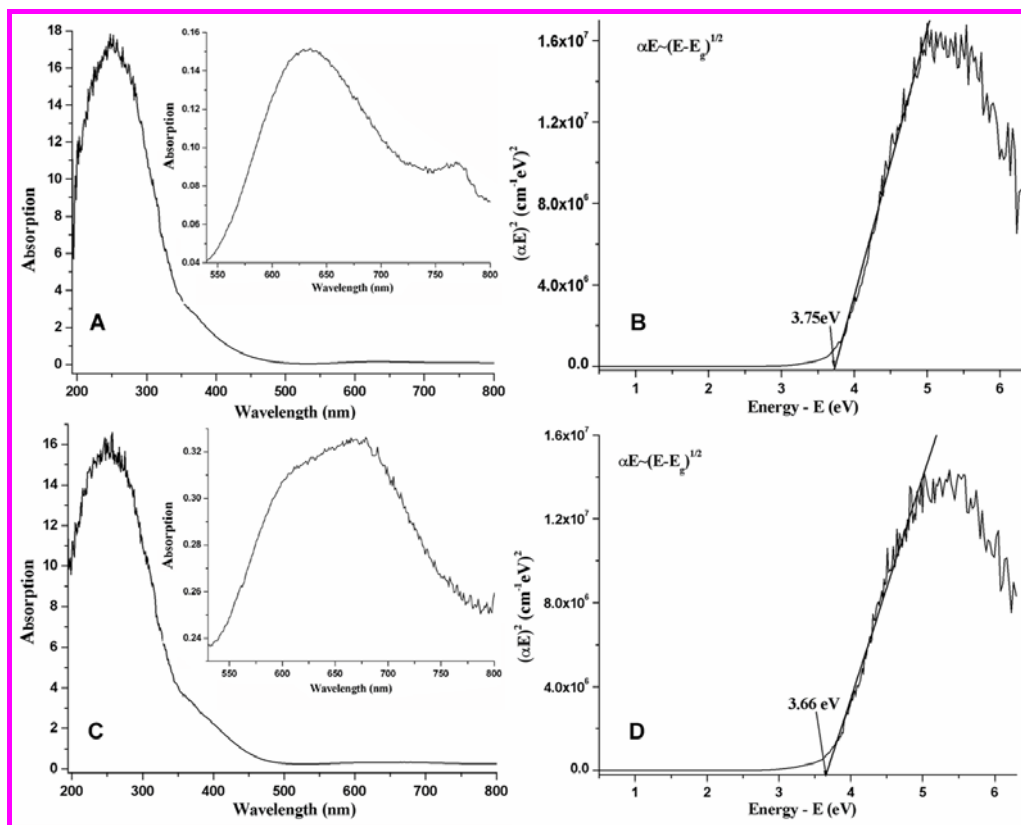

**Figure S5.** Optical absorption spectra of **3** (A) and **4** (C) and photon energy dependence of  $(\alpha E)^2$  for **3** (B) and **4** (D).

Optical absorption spectra of **3** (Fig. S5A) and **4** (Fig. S5C) show one strong absorption bands at ca. 250 nm and a weak broad absorption bands among visible region (inset Fig. S5A, C), which are attributed to the charge transfer of O–W and the d–d transfers of Ni<sup>2+</sup>, respectively. Based on the observed energy dependence function:  $\alpha E = (E - E_g)^{1/2}$  (I. Kosacki, V. Petrovsky, H. U. Anderson, *Appl. Phys. Lett.*, **1999**, *74*, 341; J. Tauc, in *Amorphous and Liquid Semiconductors*, edited by J. Tauc, Plenum, New York, **1974**, pp. 159–220), in which  $\alpha$  is the absorption coefficient and  $E_g$  is the band gap energy, the  $E_g$  value can be determined by extrapolation from the linear portion of the absorption edge in a  $(\alpha E)^2$  versus energy plot (Fig. S11B, D). The  $E_g$  of **3** and **4** are 3.75 and 3.66, respectively. The band gaps of compounds decrease with increasing dimensionality or complexity of the structures, as pointed out by Kanatzidis (E. A. Axtell, Y. Park, K. Chondroudís, M. G. Kanatzidis, *J. Am. Chem. Soc.* **1998**, *120*, 124) and Papavassiliou (G. C. Papavassiliou, *Prog Solid. State. Chem.* **1997**, *25*, 125). The band gap of **3** is slightly larger than that of **4**, which is consistent with their structural dimensionality.

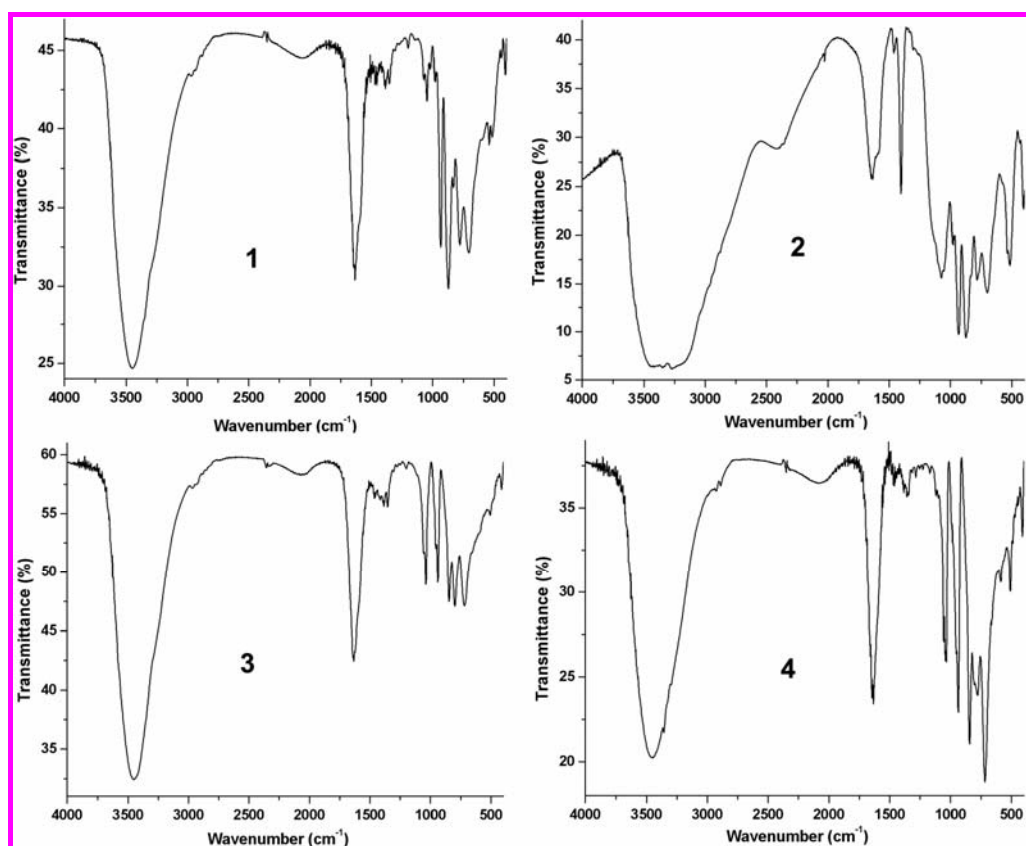

**Figure S6.** IR spectra of **1-4**.

Each of IR spectra of **1-4** exhibits an intense band at ca.  $950\text{ cm}^{-1}$ , attributed to the  $\nu(\text{W}=\text{O})$ , and features at ca.  $1050\text{ cm}^{-1}$  due to  $\nu(\text{Si}-\text{O}$  or  $\text{P}-\text{O})$ , bands in the  $400\text{-}764\text{ cm}^{-1}$  region are characteristics of  $\nu(\text{M}-\text{O}-\text{M})$  ( $\text{M} = \text{W}$  or  $\text{Ni}$ ) and  $\nu(\text{Ni}-\text{O})$ . The characteristics of the  $\text{NH}_2$  and  $\text{CH}_2$  groups are fallen in the  $1300\text{-}1500$  and  $2750\text{-}3300\text{ cm}^{-1}$  region.

## The detailed description of disordered atoms in compounds **1-4**.

**Compound 1** (The plots and tables based on [1-622063.cif](#) are given in [Figure S7-9](#) and [Table S1-3](#))

The atoms C4, C5, C7, C8 and C9 of two enMe ligands are disordered and each is modelled over two sites using PART instruction. The displacement and geometrical restraints have been applied to their anisotropic thermal parameters. The occupancies of disordered C4/C4A, C5/C5A, C7/C7A, C8/C8A and C9/C9A atoms are refined as 0.26/0.74, 0.26/0.74, 0.54/0.46, 0.54/0.46 and 0.54/0.46, respectively. The H atoms have been included in these disorder models. These disorder models and bond lengths and angles between these disordered atoms are shown in [Figure S7-8](#) and [Table S1-2](#). In addition, the atoms Ni7, OW7, OW8 and OW9 of isolated  $[\text{Ni}(\text{OW})_6]^{2+}$  complex in **1** are also disordered and modelled over two adjacent positions according to the splitting suggestion of SHELXL.lst file with occupancies of 0.22/0.28, 0.5/0.5, 0.5/0.5 and 0.5/0.5, respectively. It is notable that the Ni7 atom is situated on a center of symmetry ([Figure S9](#) and [Table S3](#)). All of the above-mentioned disordered atoms have been refined anisotropically. The H atoms were not

added to all water molecules including the isolated water and terminal water ligands that coordinated to Ni<sub>6</sub> core.

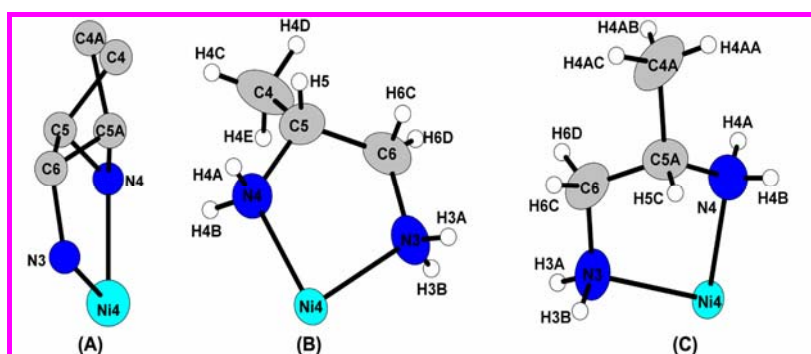

**Figure S7.** (A) View of the disordered model of enMe coordinated to the Ni<sub>4</sub> atom of Ni<sub>6</sub> core of **1**. All the H atoms are omitted for clarity. (B) and (C) ORTEP view of the two sets of separate disordered models of enMe including H atoms (50% thermal ellipsoids).

**Table S1.** The bond lengths and angles for the disordered C4 and C5 atoms, respectively.

| Bond Lengths | Å     | Bond Lengths | Å     | Bond Lengths | Å     |
|--------------|-------|--------------|-------|--------------|-------|
| C4-C5        | 1.530 | C6-N3        | 1.464 | C5A-N4       | 1.489 |
| C5-C6        | 1.525 | C4A-C5A      | 1.547 |              |       |
| C5-N4        | 1.407 | C5A-C6       | 1.503 |              |       |
| Bond Angles  | (deg) | Bond Angles  | (deg) | Bond Angles  | (deg) |
| C4-C5-C6     | 106.4 | N4-C5-C6     | 109.6 | C4A-C5A-C6   | 108.3 |
| C4-C5-N4     | 96.8  | N4-C5A-C4A   | 113.8 | C6-C5A-N4    | 106.6 |

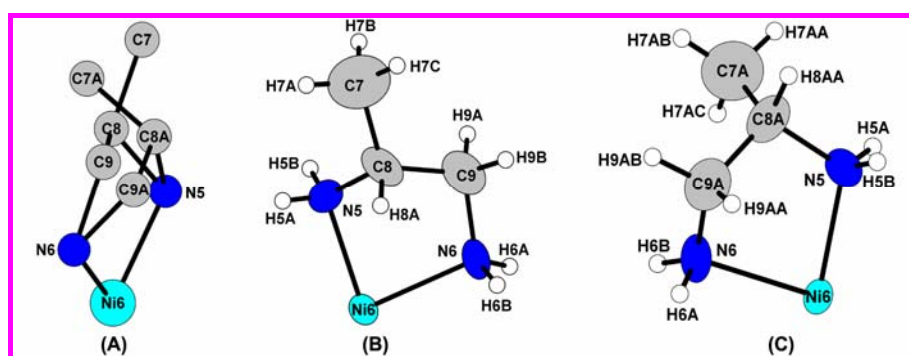

**Figure S8.** (A) View of the disordered model of enMe coordinated to the Ni<sub>6</sub> atom of Ni<sub>6</sub> core of **1**. All the H atoms are omitted for clarity. (B) and (C) ORTEP view of the two sets of separate disordered models of enMe including H atoms (50% thermal ellipsoids).

**Table S2.** The bond lengths and angles for the disordered C7, C8 and C9 atoms, respectively.

| Bond Lengths | Å     | Bond Lengths | Å     | Bond Lengths | Å     |
|--------------|-------|--------------|-------|--------------|-------|
| C7-C8        | 1.534 | C9-N6        | 1.513 | C8A-N5       | 1.512 |
| C8-C9        | 1.511 | C7A-C8A      | 1.533 | C9A-N6       | 1.450 |
| C8-N5        | 1.514 | C8A-C9A      | 1.529 |              |       |
| Bond Angles  | (deg) | Bond Angles  | (deg) | Bond Angles  | (deg) |

|          |       |            |       |             |       |
|----------|-------|------------|-------|-------------|-------|
| C7-C8-C9 | 116.8 | N5-C8-C9   | 103.1 | C7A-C8A-C9A | 115.9 |
| C7-C8-N5 | 113.0 | N5-C8A-C9A | 109.3 | C7A-C8A-N5  | 101.4 |

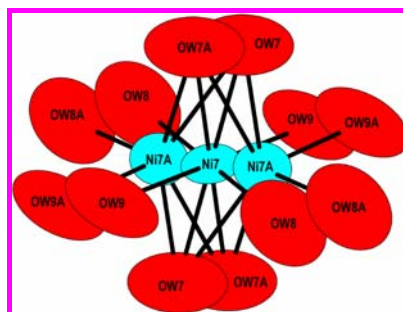

**Figure S9.** (A) ORTEP view of the disordered model of isolated  $[\text{Ni}(\text{OW})_6]^{2+}$  complex (50% thermal ellipsoids), showing the disordered Ni7 atom is located at the center of symmetry.

**Table S3.** The bond lengths and angles for the disordered Ni7, OW7, OW8 and OW9 atoms, respectively.

| Bond Lengths | Å     | Bond Lengths | Å     | Bond Lengths | Å     |
|--------------|-------|--------------|-------|--------------|-------|
| Ni7-OW7      | 2.079 | Ni7-OW9      | 2.017 | Ni7A-OW8A    | 1.938 |
| Ni7-OW7A     | 2.102 | Ni7A-OW7     | 2.091 | Ni7A-OW9A    | 1.999 |
| Ni7-OW8      | 1.832 | Ni7A-OW7A    | 2.375 |              |       |

**Compound 2** (The plots and tables based on 2-622064.cif are given in Figure S10-11 and Table S4-5)

The atoms C1, C2, C3, C4, C5 and C6 of two enMe ligands are disordered and each is modelled over two sites using PART instruction. The displacement and geometrical restraints have been applied to their anisotropic thermal parameters. The occupancies of disordered C1/C1A, C2/C2A, C3/C3A, C4/C4A, C5/C5A and C6/C6A atoms are refined as 0.30/0.70, 0.30/0.70, 0.30/0.70, 0.48/0.52, 0.48/0.52 and 0.48/0.52, respectively. The H atoms have been included in these disorder models. These disorder models and bond lengths and angles between these disordered atoms are shown in Figure S10-11 and Table S4-5, respectively. In addition, some isolated water molecules OW7, OW8, OW9 and OW11 in **2** are also disordered and modelled over two adjacent positions according to the splitting suggestion of SHELXL.lst file with occupancies of 0.5/0.5, 0.5/0.5, 0.25/0.25 and 0.25/0.25, respectively. All of the above-mentioned disordered atoms have been refined anisotropically. The H atoms were not added to all water molecules including the isolated water and terminal water ligands that coordinated to  $\text{Ni}_6$  core.

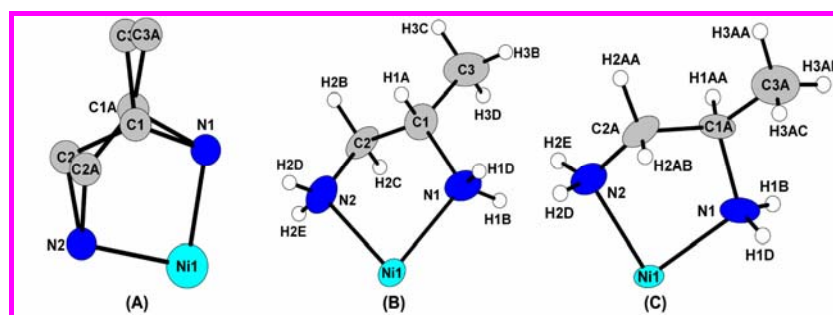

**Figure S10.** (A) View of the disordered model of enMe coordinated to the Ni1 atom of  $\text{Ni}_6$  core of **2**. All the H atoms are omitted for clarity. (B) and (C) ORTEP view of the two sets of separate disordered models of enMe including H atoms (50% thermal ellipsoids).

**Table S4.** The bond lengths and angles for the disordered C1, C2 and C3 atoms, respectively.

| Bond Lengths | Å     | Bond Lengths | Å     | Bond Lengths | Å     |
|--------------|-------|--------------|-------|--------------|-------|
| C1-C3        | 1.529 | C2-N2        | 1.511 | C1A-N1       | 1.508 |
| C1-C2        | 1.529 | C3A-C1A      | 1.549 | C2A-N2       | 1.524 |
| C1-N1        | 1.486 | C1A-C2A      | 1.521 |              |       |

| Bond Angles | (deg) | Bond Angles | (deg) | Bond Angles | (deg) |
|-------------|-------|-------------|-------|-------------|-------|
| C3-C1-C2    | 102.4 | N1-C1-C2    | 113.8 | C3A-C1A-C2A | 121.1 |
| C3-C1-N1    | 110.3 | N1-C1A-C3A  | 110.6 | C2A-C1A-N1  | 105.6 |

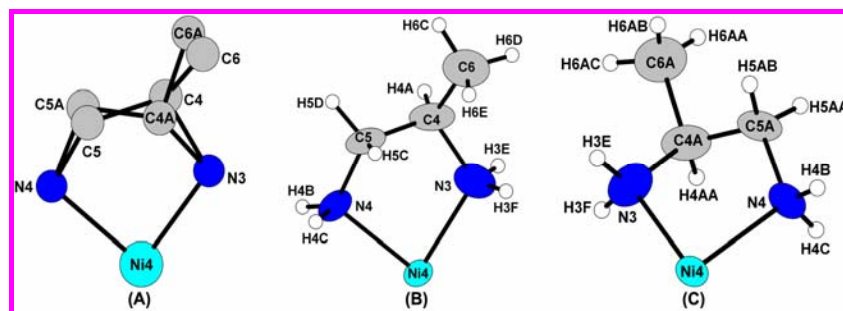

**Figure S11.** (A) View of the disordered model of enMe coordinated to the Ni4 atom of Ni<sub>6</sub> core of **2**. All the H atoms are omitted for clarity. (B) and (C) ORTEP view of the two sets of separate disordered models of enMe including H atoms (50% thermal ellipsoids).

**Table S5.** The bond lengths and angles for the disordered C4, C5 and C6 atoms, respectively.

| Bond Lengths | Å     | Bond Lengths | Å     | Bond Lengths | Å     |
|--------------|-------|--------------|-------|--------------|-------|
| C4-C6        | 1.538 | C5-N4        | 1.511 | C4A-N3       | 1.556 |
| C4-C5        | 1.522 | C4A-C6A      | 1.485 | C5A-N4       | 1.473 |
| C4-N3        | 1.452 | C4A-C5A      | 1.521 |              |       |
| Bond Angles  | (deg) | Bond Angles  | (deg) | Bond Angles  | (deg) |
| C6-C4-C5     | 102.8 | N3-C4-C5     | 106.0 | C6A-C4A-C5A  | 103.1 |
| C6-C4-N3     | 106.2 | N3-C4A-C6A   | 113.9 | C5A-C4A-N3   | 104.8 |

**Compound 3** (The plots and tables based on 3-622065.cif are given in Figure S12-14 and Table S6-8)

The atoms C2, C3 and C6 of two enMe ligands and C11 of one CH<sub>3</sub>COO<sup>-</sup> ligand are disordered and each is modelled over two sites using PART instruction. The displacement and geometrical restraints have been applied to their anisotropic thermal parameters. The occupancies of disordered C2/C2A, C3/C3A, C6/C6A and C11/C11A atoms are refined as 0.64/0.36, 0.64/0.36, 0.72/0.28, and 0.57/0.43, respectively. The H atoms have been included in these disorder models. These disordered atoms have been refined anisotropically. These disorder models and bond lengths and angles between these disordered atoms are shown in Figure S12-14 and Table S6-8. In addition, some isolated water molecules OW6, OW7, OW8, OW9 and OW11 in **3** are also refined with statistical disorder. The H atoms were not added to all water molecules including the isolated water and terminal water ligands that coordinated to Ni<sub>6</sub> core.

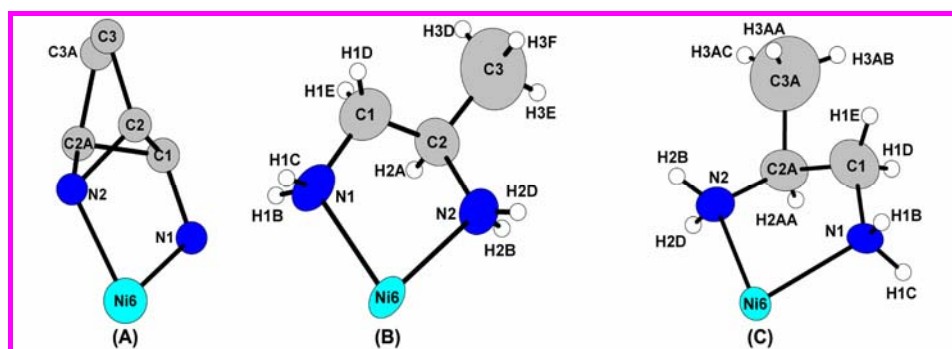

**Figure S12.** (A) View of the disordered model of enMe coordinated to the Ni6 atom of Ni<sub>6</sub> core of **3**. All the H atoms on are omitted for clarity. (B) and (C) ORTEP view of the two sets of separate disordered models of enMe including H atoms (50% thermal ellipsoids).

**Table S6.** The bond lengths and angles for the disordered C2 and C3 atoms, respectively.



| Bond Lengths | Å     | Bond Lengths | Å     | Bond Lengths | Å     |
|--------------|-------|--------------|-------|--------------|-------|
| C1-C2        | 1.526 | C1-N1        | 1.466 | C2A-N2       | 1.506 |
| C2-C3        | 1.536 | C1-C2A       | 1.535 |              |       |
| C2-N2        | 1.566 | C2A-C3A      | 1.539 |              |       |
| Bond Angles  | (deg) | Bond Angles  | (deg) | Bond Angles  | (deg) |
| C3-C2-C1     | 115.2 | N2-C2-C1     | 101.8 | C6A-C4A-C5A  | 103.1 |
| C3-C2-N2     | 115.5 | N3-C4A-C6A   | 113.9 | C5A-C4A-N3   | 104.8 |

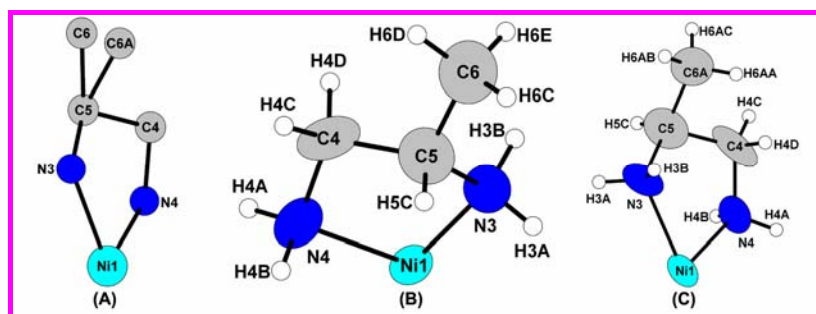

**Figure S13.** (A) View of the disordered model of enMe coordinated to the Ni1 atom of Ni<sub>6</sub> core of **3**. All the H atoms are omitted for clarity. (B) and (C) ORTEP view of the two sets of separate disordered models of enMe including H atoms (50% thermal ellipsoids).

**Table S7.** The bond lengths and angles for the disordered C5 atom, respectively.

| Bond Lengths | Å     | Bond Lengths | Å     | Bond Lengths | Å     |
|--------------|-------|--------------|-------|--------------|-------|
| C5-C6        | 1.553 | C5-N3        | 1.447 | C5-C6A       | 1.532 |
| C4-C5        | 1.522 | C4-N4        | 1.477 |              |       |
| Bond Angles  | (deg) | Bond Angles  | (deg) | Bond Angles  | (deg) |
| C6-C5-C4     | 115.2 | N3-C5-C4     | 108.1 | C6A-C5-N3    | 114.2 |
| C6-C5-N3     | 114.3 | C6A-C5-C4    | 90.8  |              |       |

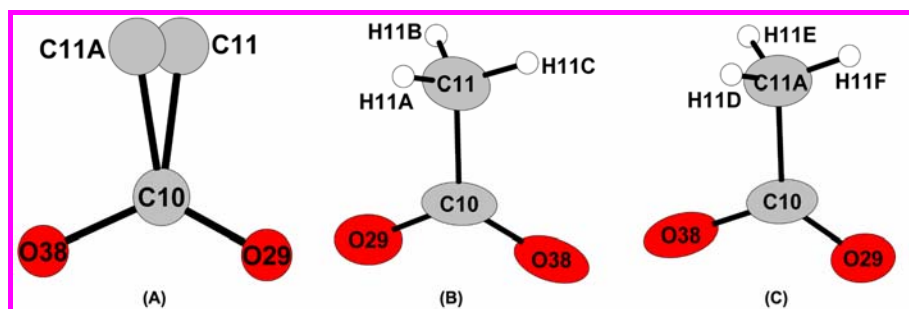

**Figure S14.** (A) View of the disordered model of CH<sub>3</sub>COO ligand in Ni<sub>6</sub> core of **3**. All the H atoms are omitted for clarity. (B) and (C) ORTEP view of the two sets of separate disordered models of CH<sub>3</sub>COO ligand including H atoms (50% thermal ellipsoids).

**Table S8.** The bond lengths and angles for the disordered C11 atom, respectively.

| Bond Lengths | Å     | Bond Lengths | Å     | Bond Lengths | Å     |
|--------------|-------|--------------|-------|--------------|-------|
| C11-C10      | 1.533 | C11A-C10     | 1.544 |              |       |
| Bond Angles  | (deg) | Bond Angles  | (deg) | Bond Angles  | (deg) |
| C11-C10-O38  | 120.4 | C11A-C10-O38 | 105.3 |              |       |
| C11-C10-O29  | 111.6 | C11A-C10-O29 | 125.6 |              |       |

**Compound 4** (The plots and tables based on 4-622066.cif are given in Figure S15 and Table S9)

The atoms C1 and C2 of one dien ligand are disordered and each is modelled over two sites using PART instruction. The displacement and geometrical restraints have been applied to their anisotropic thermal parameters. The occupancies of disordered C1/C1A and C2/C2A atoms are refined as 0.62/0.38 and 0.62/0.38, respectively. The H atoms have been included in these disorder models. These disorder models and bond lengths and angles between these disordered atoms are shown in Figure S15 and Table S9, respectively. These disordered atoms have been refined anisotropically. In addition, some isolated water molecules OW2 and OW4 in **4** are also disordered and modelled over two adjacent positions according to the splitting suggestion of SHELXL.lst file with occupancies of 0.5/0.5 and 0.25/0.25, respectively. The H atoms were not added to all water molecules including the isolated water and terminal water ligands that coordinated to Ni<sub>6</sub> core.

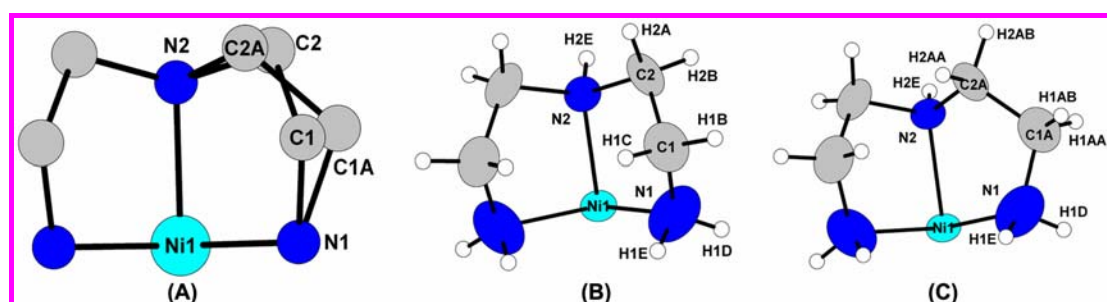

**Figure S15.** (A) View of the disordered model of dien coordinated to Ni1 atom of Ni<sub>6</sub> core of **4**. All the H atoms are omitted for clarity. (B) and (C) ORTEP view of the two sets of separate disordered models of dien ligand including H atoms (50% thermal ellipsoids).

**Table S9.** The bond lengths and angles for the disordered C1 and C2 atoms, respectively.

| <b>Bond Lengths</b> | <b>Å</b>     | <b>Bond Lengths</b> | <b>Å</b>     | <b>Bond Lengths</b> | <b>Å</b>     |
|---------------------|--------------|---------------------|--------------|---------------------|--------------|
| C1-C2               | 1.517        | N1-C1               | 1.460        | N2-C2               | 1.442        |
| C1A-C2A             | 1.529        | N1-C1A              | 1.482        | N2-C2A              | 1.319        |
| <b>Bond Angles</b>  | <b>(deg)</b> | <b>Bond Angles</b>  | <b>(deg)</b> | <b>Bond Angles</b>  | <b>(deg)</b> |
| N2-C2-C1            | 109.2        | N1-C1A-C2A          | 110.8        |                     |              |
| N1-C1-C2            | 107.4        | N2-C2A-C1A          | 110.4        |                     |              |
